# Supplementary material for: Association of the incidence of atopic dermatitis until 3 years old with birth month and with sunshine duration and humidity in the first 6 months of life: Japan Environment and Children’s Study
Source: HighWire-hosted journal article supplement (doi:10.1136/bmjopen-2020-047226), 2021-07-01

1    **Supplementary Figure 1.** Incidence of atopic dermatitis in relation to birth month.

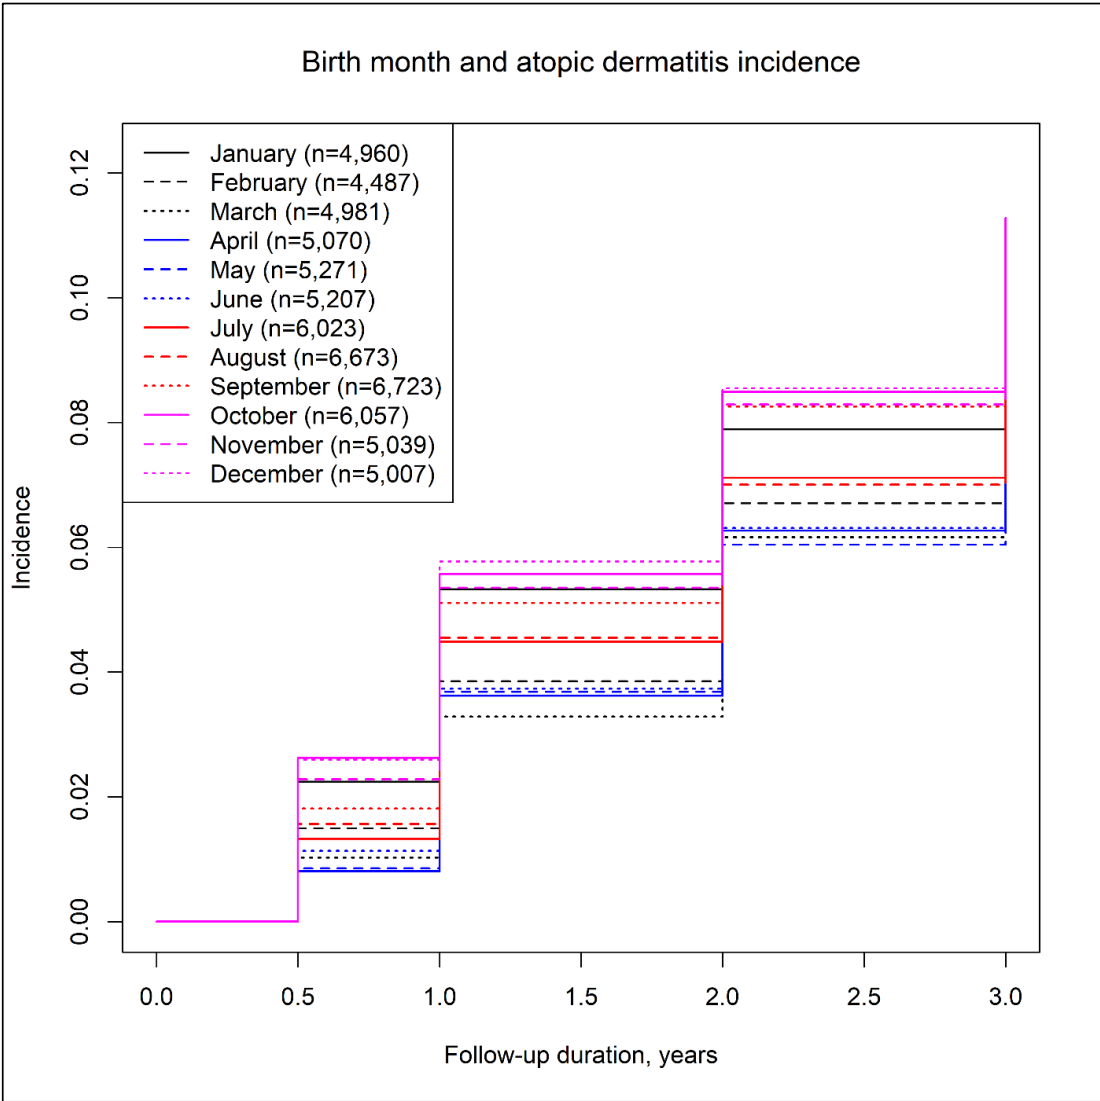

9 **Supplementary Figure 2.** Birth season and incidence of atopic dermatitis in a Japanese birth cohort with  
10 the seasons starting from February.

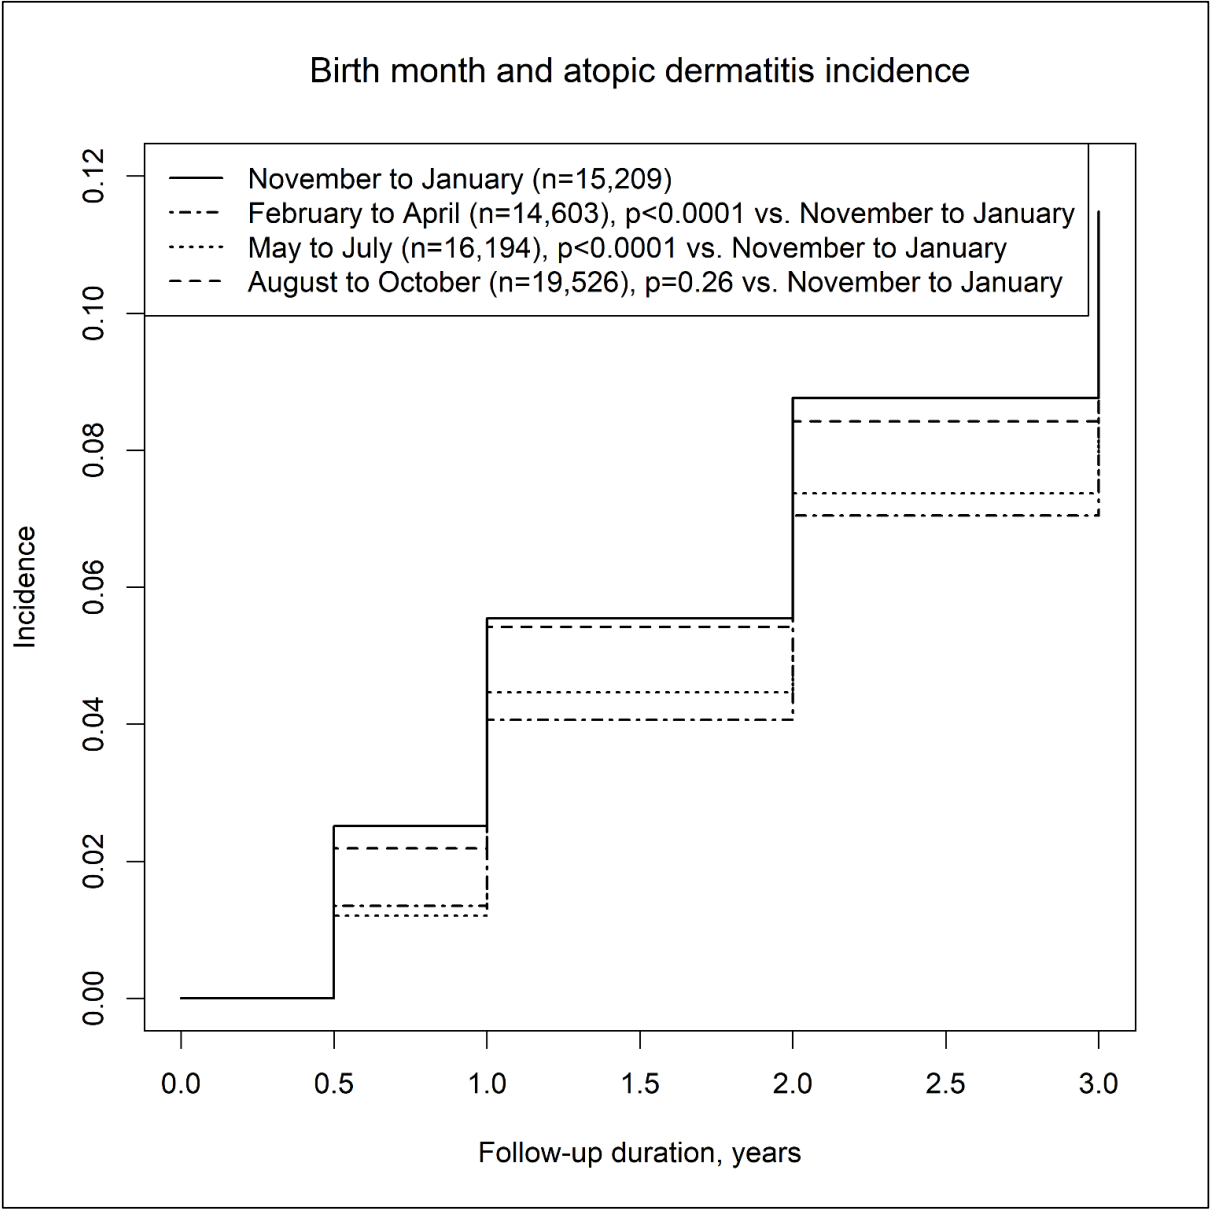

16 **Supplementary Figure 3.** Birth season and incidence of atopic dermatitis in a Japanese birth cohort with  
17 the seasons starting from March.

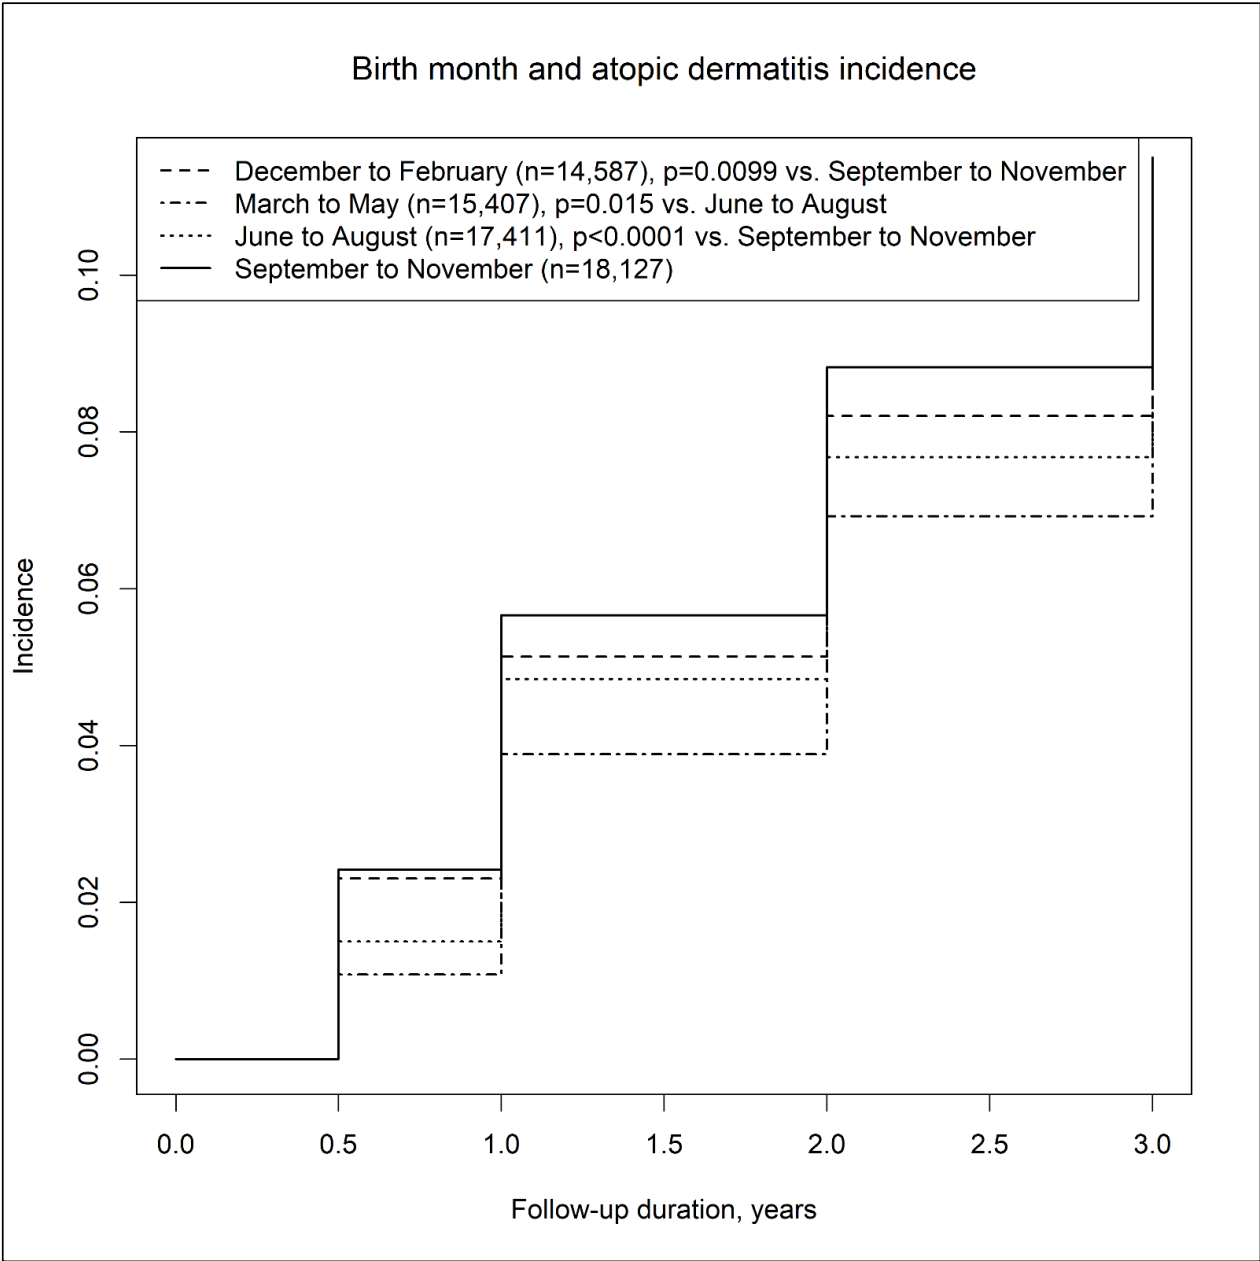

22 **Supplementary Figure 4.** Birth season and incidence of atopic dermatitis in children whose parents had a  
23 history of allergic disease.

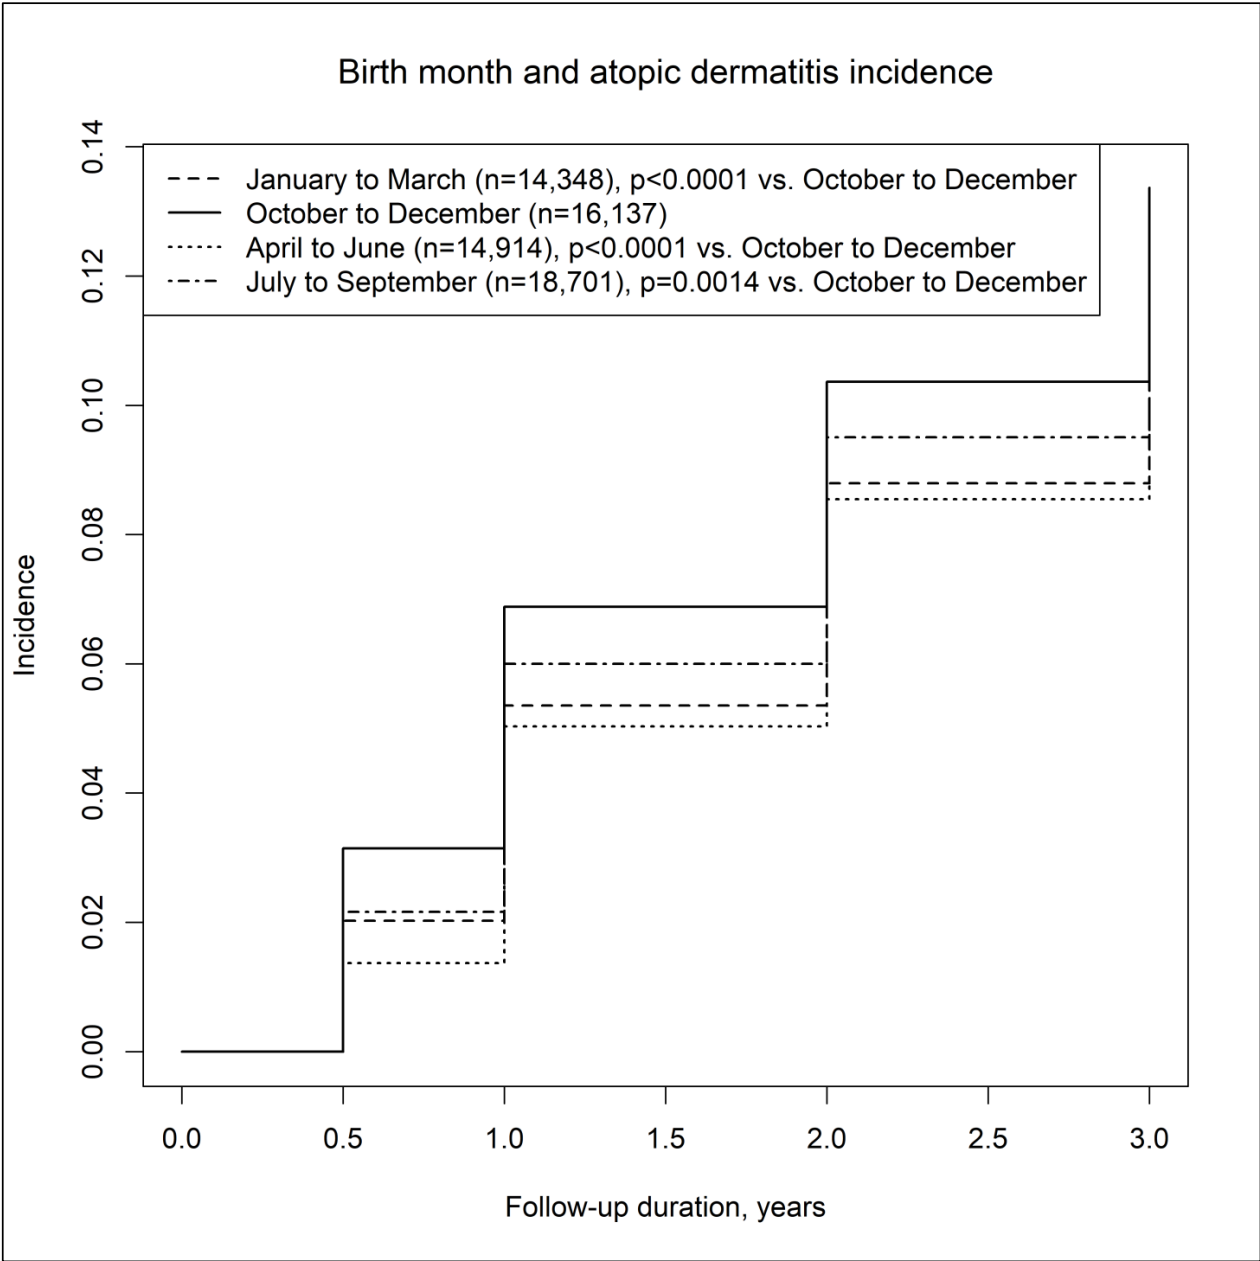

28 **Supplementary Figure 5.** Birth season and incidence of atopic dermatitis in children whose parents had no  
29 history of allergic disease.

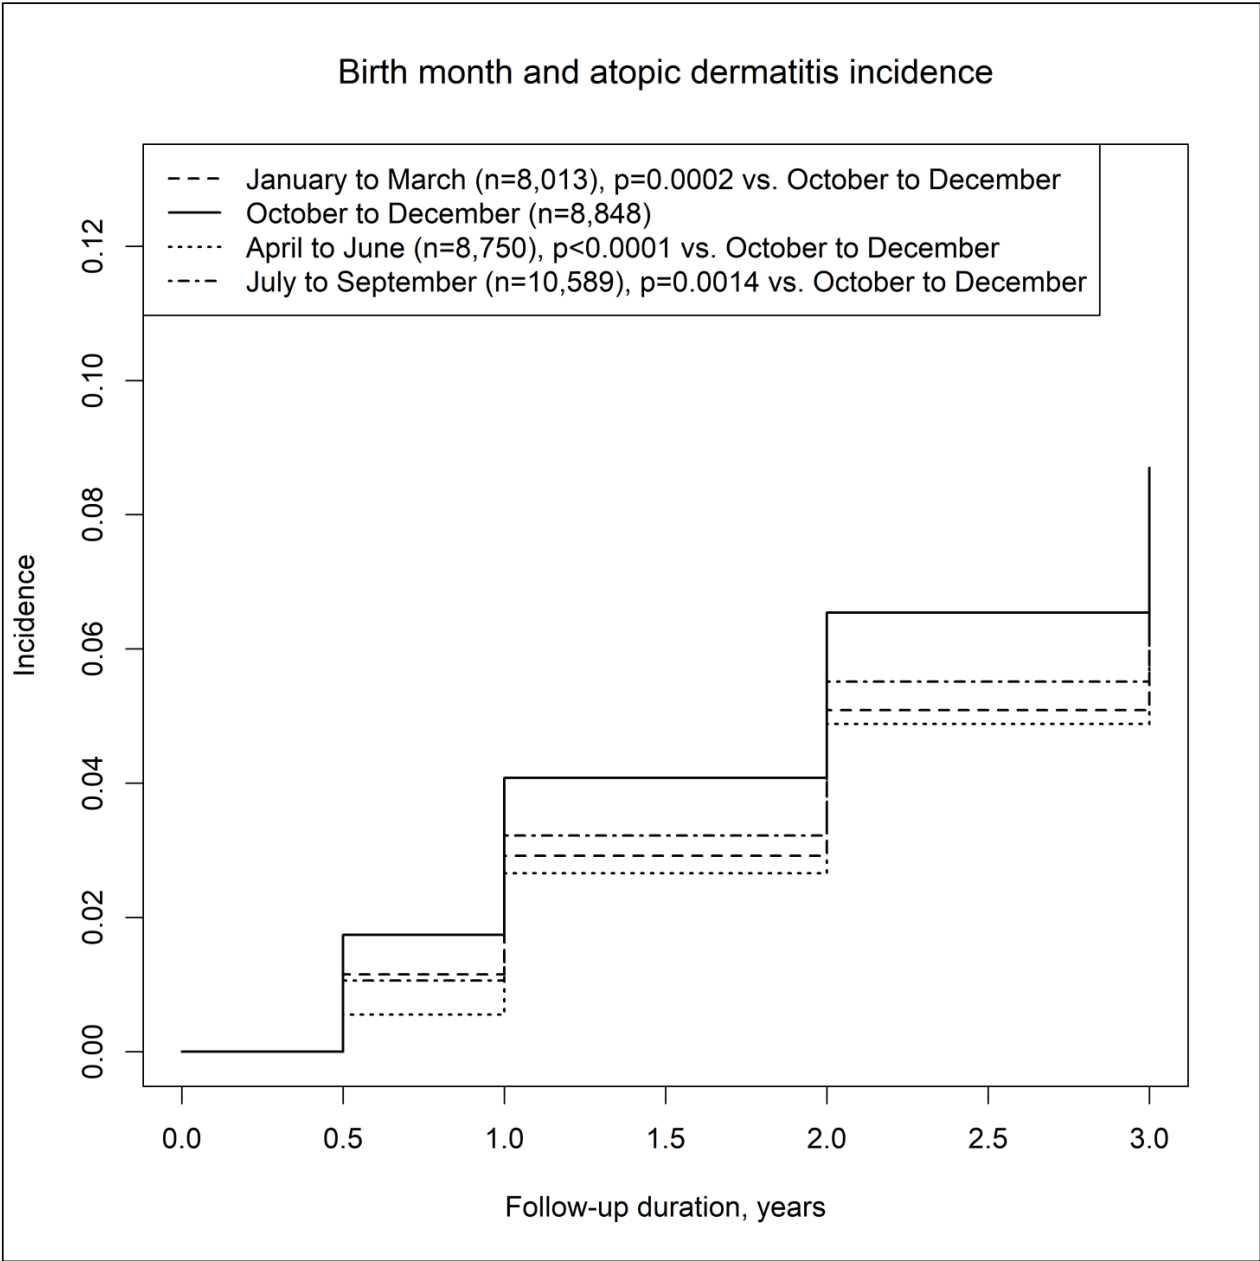

Supplement: bmjopen-2020-047226supp002_data_supplement.pdf [file bmjopen-2020-047226supp002_data_supplement.pdf]
